# Supplementary material
Source: PubMed Central journal article supplement (PMC4844801)

Supplemental Table 1. Posthoc Backward Regression Models Predicting SLLT delayed cued recall (hits-false positives) performance from significant connectivity ROIs (from Table 5), sex, and scanner site by group.

---

**HC**

The model was not significant,  $p = .317$

---

**rMDD**

A significant model emerged:  $F(7,26) = 5.175$ ,  $p = .001$ , adjusted  $R^2 = .470$

| <b>Variable</b>                                   | <b><math>\beta</math></b> | <b><math>p</math></b> |
|---------------------------------------------------|---------------------------|-----------------------|
| 19. Left Hippocampus—Left Middle Temporal Gyrus   | .280                      | .111                  |
| 20. Right Hippocampus—Right Parahippocampal Gyrus | .335                      | .197                  |
| 21. Right Hippocampus—Right Claustrum             | .717                      | .052                  |
| 22. Right Hippocampus—Left Putamen                | -.589                     | .099                  |
| 23. Right Hippocampus—Right Declive of Cerebellum | .152                      | .351                  |
| Sex                                               | -.045                     | .762                  |
| Site                                              | -.025                     | .889                  |

---

Supplemental Table 2. Correlations between Table 5 Regression Analysis (post principal components analysis) and Neuropsychological Test Performance Raw Data.

|                                            | <b>HC Negative Recall</b> |         |         | <b>rMDD Positive Recall</b> |
|--------------------------------------------|---------------------------|---------|---------|-----------------------------|
|                                            | PC 1                      | PC2     | PC3     | PC1                         |
| <b>Estimated Verbal IQ</b>                 | -0.26                     | 0.09    | -0.79*  | 0.002                       |
| <b><u>Memory</u></b>                       |                           |         |         |                             |
| <b>SLLT</b>                                |                           |         |         |                             |
| Delayed Cued Recall (Hits-False Positives) | -0.59**                   | -0.66** | -0.68** | 0.69**                      |
| Recognition (Hits-False Positives)         | -0.51*                    | -0.63** | -0.63** | 0.68**                      |
| Delayed Cued Recall d'                     | -0.34                     | -0.50*  | -0.54** | 0.60**                      |
| Delayed Recognition, d'                    | -0.46*                    | -0.69** | -0.48*  | 0.58**                      |
| <b>CVLT-II</b>                             |                           |         |         |                             |
| Long Delay Free Recall                     | -0.19                     | -0.11   | 0.004   | 0.22                        |
| Recognition                                | -0.47*                    | -0.20   | -0.15   | 0.08                        |
| <b><u>Language</u></b>                     |                           |         |         |                             |
| <b>Verbal Fluency</b>                      |                           |         |         |                             |
| Letter                                     | -0.17                     | -0.13   | -0.31   | 0.47**                      |
| Animals                                    | -0.06                     | -0.06   | 0.09    | 0.39*                       |
| <b><u>Visuospatial</u></b>                 |                           |         |         |                             |
| <b>Benton Visual Form Discrim.</b>         | 0.002                     | -0.30   | 0.57    | -0.14                       |
| <b><u>Motor</u></b>                        |                           |         |         |                             |
| <b>Purdue Pegboard</b>                     |                           |         |         |                             |
| Bilateral Average                          | -0.41                     | -0.05   | -0.23   | 0.07                        |
| <b>Digit Symbol Coding</b>                 | -0.48*                    | -0.37   | -0.27   | 0.20                        |
| <b>Trail Making Test- A</b>                | 0.30                      | -0.01   | 0.19    | -0.34*                      |
| <b><u>Executive Functioning</u></b>        |                           |         |         |                             |
| <b>Trail Making Test- B</b>                | 0.41                      | 0.23    | 0.54*   | -0.20                       |
| <b>Stroop</b>                              |                           |         |         |                             |
| Interference (T)                           | -0.11                     | -0.23   | -0.33   | 0.12                        |
| <b>Wisconsin Card Sorting Test</b>         |                           |         |         |                             |
| Total Correct                              | 0.21                      | -0.35   | -0.09   | -0.15                       |
| Perseverative Errors                       | -0.25                     | -0.44*  | -0.07   | 0.16                        |

### Figure Legends

Figure 1. Whole Group Baseline Connectivity Covaried by Sex, Left Hippocampal Seed.

Combined HC and rMDD connectivity (aqua); HCs demonstrating greater connectivity than rMDD within network (lime green); rMDD demonstrating greater connectivity than HCs extra-network (red).

Figure 2. Whole Group Baseline Connectivity Covaried by Sex, Right Hippocampal Seed.

Combined HC and rMDD connectivity (aqua); HCs demonstrating greater connectivity than rMDD within network (lime green); rMDD demonstrating greater connectivity than HCs extra-network (red).

Figure 3. Predicting Connectivity from SLLT Performance by Group using Sex corrected Cued Recall-False Positive scores. Panel A represents HC resting state connectivity pattern for negative cued recall for the i) left hippocampal seed and ii) the right hippocampal seed. Panel B represents resting state connectivity pattern in rMDD for positive cued recall for the i) left hippocampal seed and ii) the right hippocampal seed.

Figure 4. Recall Serial Position Curve of the SLLT by Group and Gender.

Figure 1.

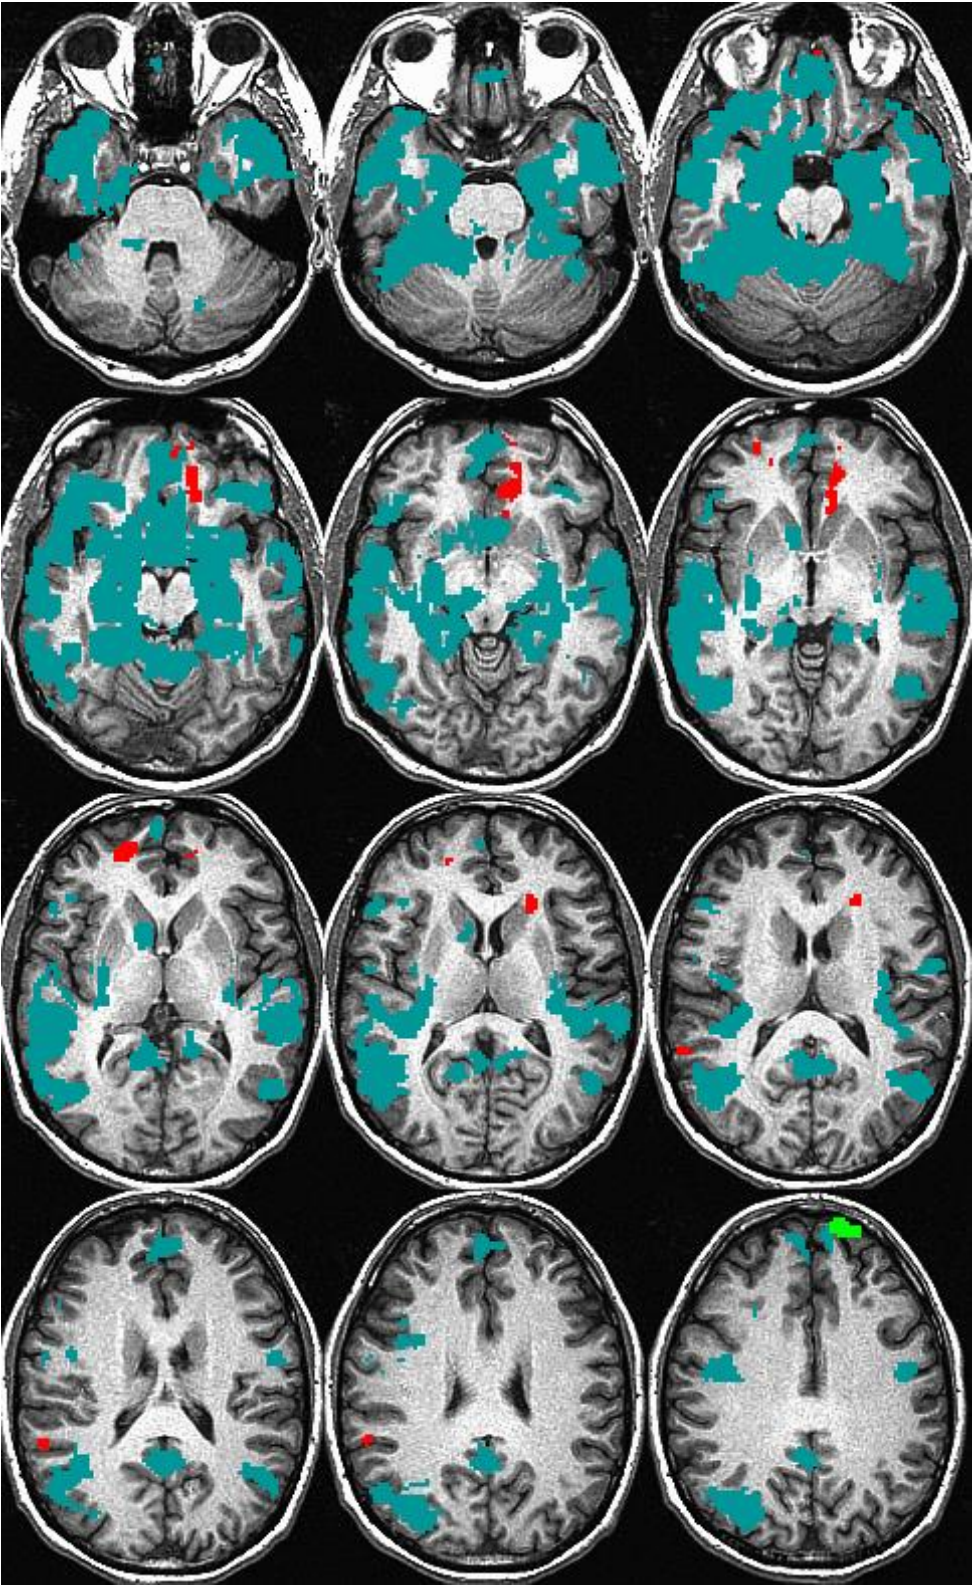

Figure 2.

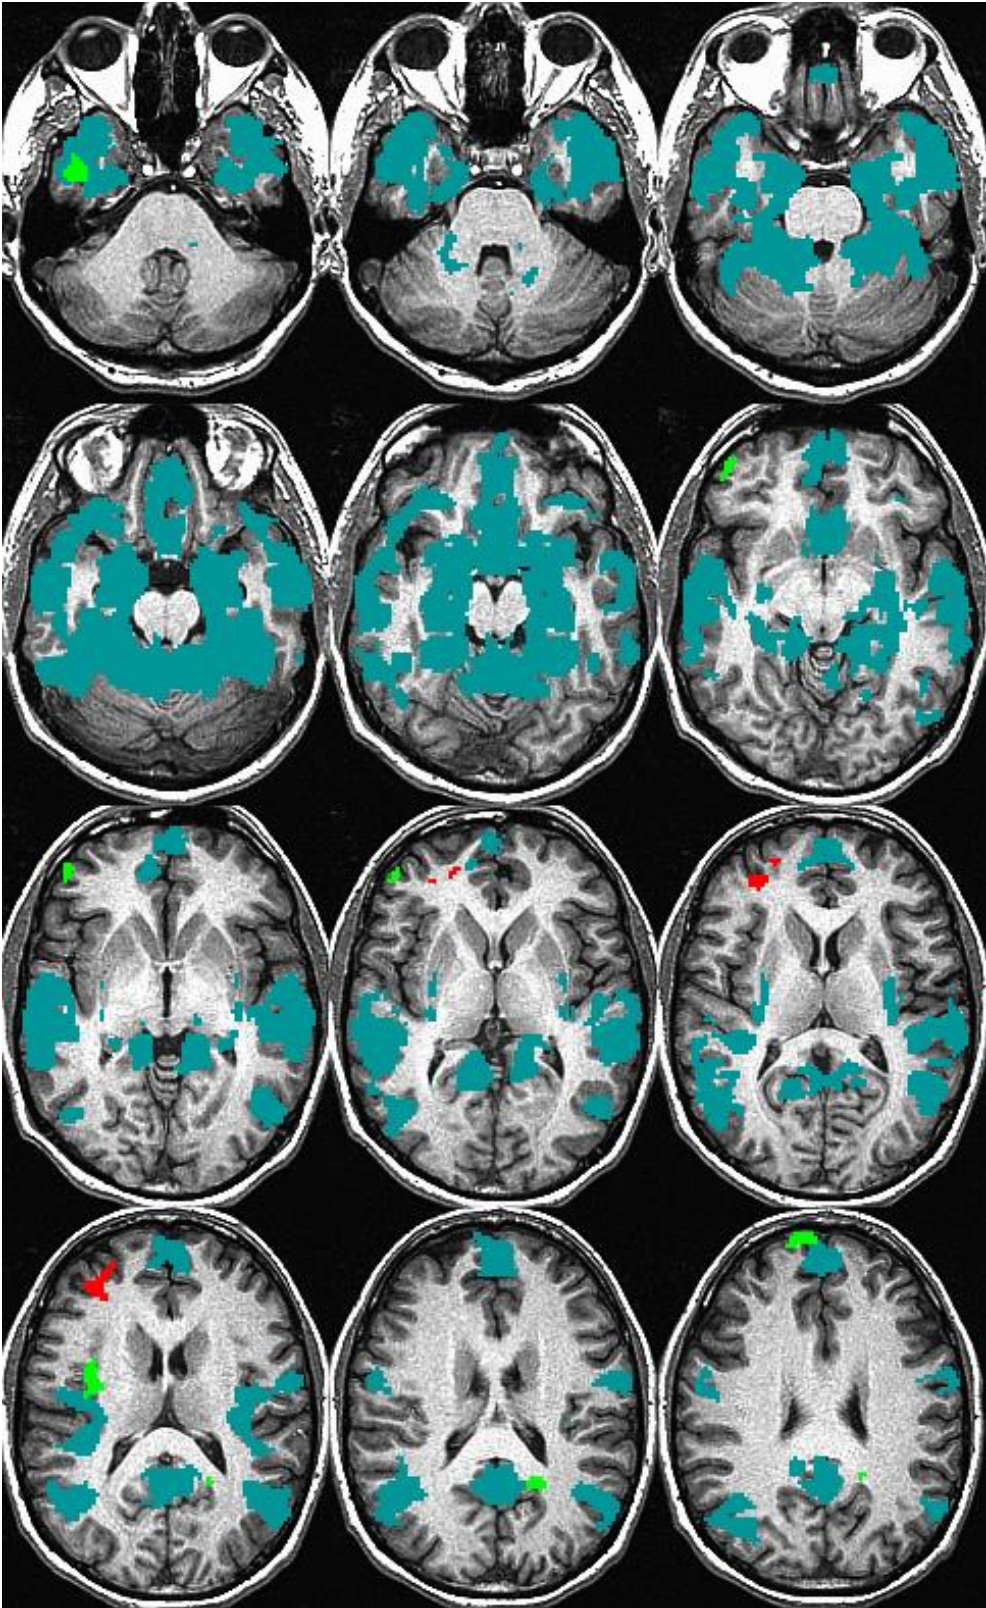

Figure 3.

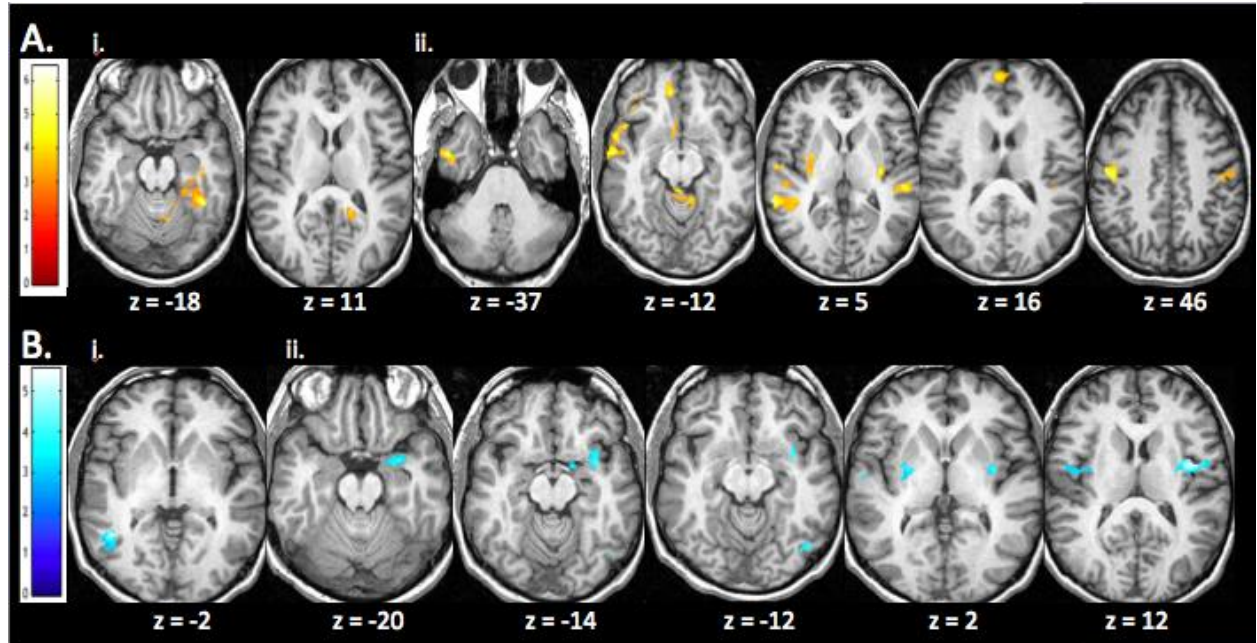

Figure 4.

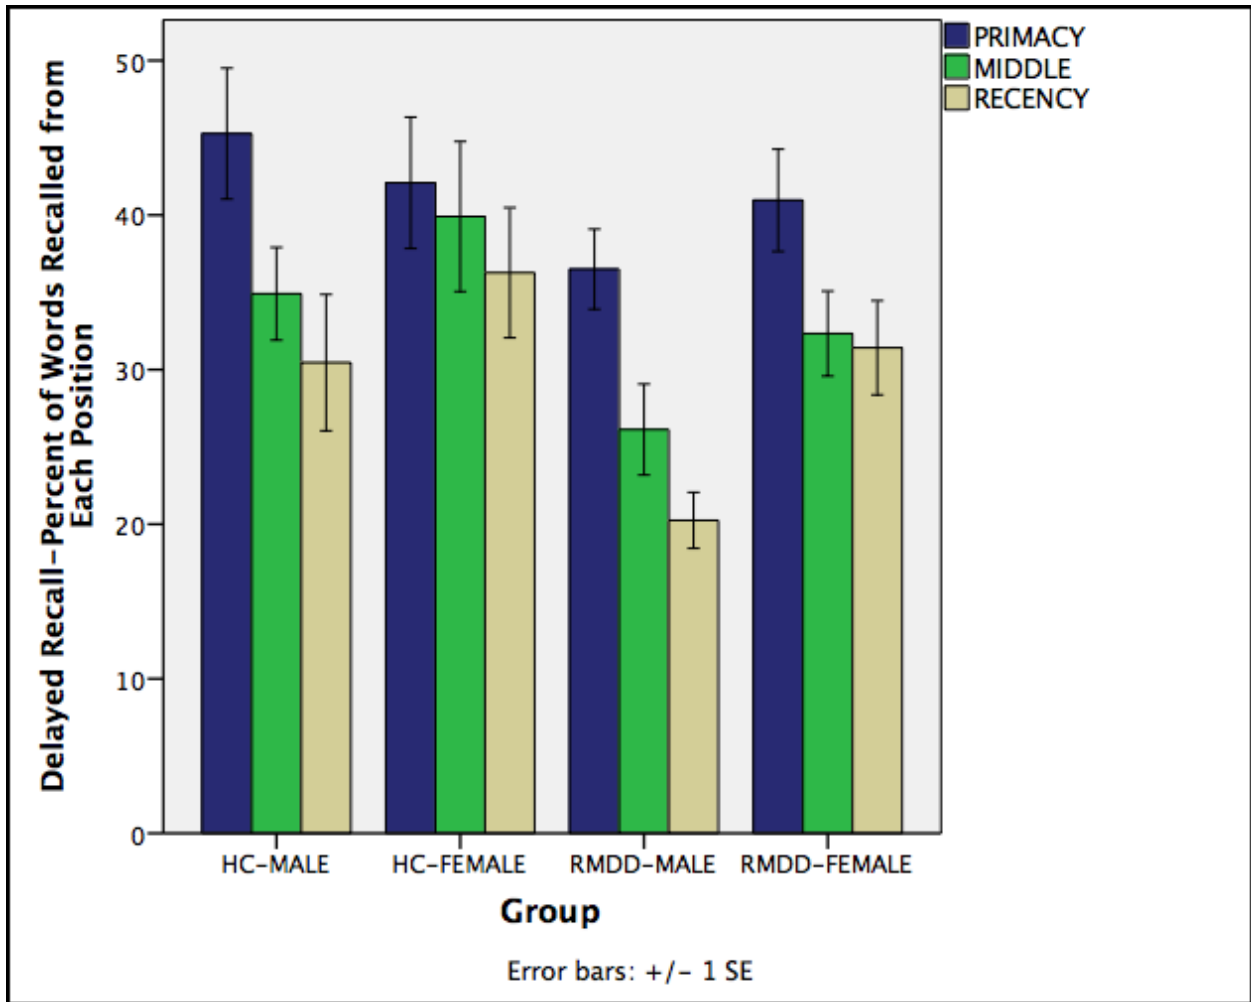

Supplement: NIHMS779672-supplement-supplement_1.pdf [file NIHMS779672-supplement-supplement_1.pdf]
